# Supplementary material
Source: Springer Nature journal article supplement (https://www.springermedizin.de/resource/supplementary/12916_2012_625_MOESM2_ESM.pdf/9597948)
Supplement: MOESM2 [file 9597948]

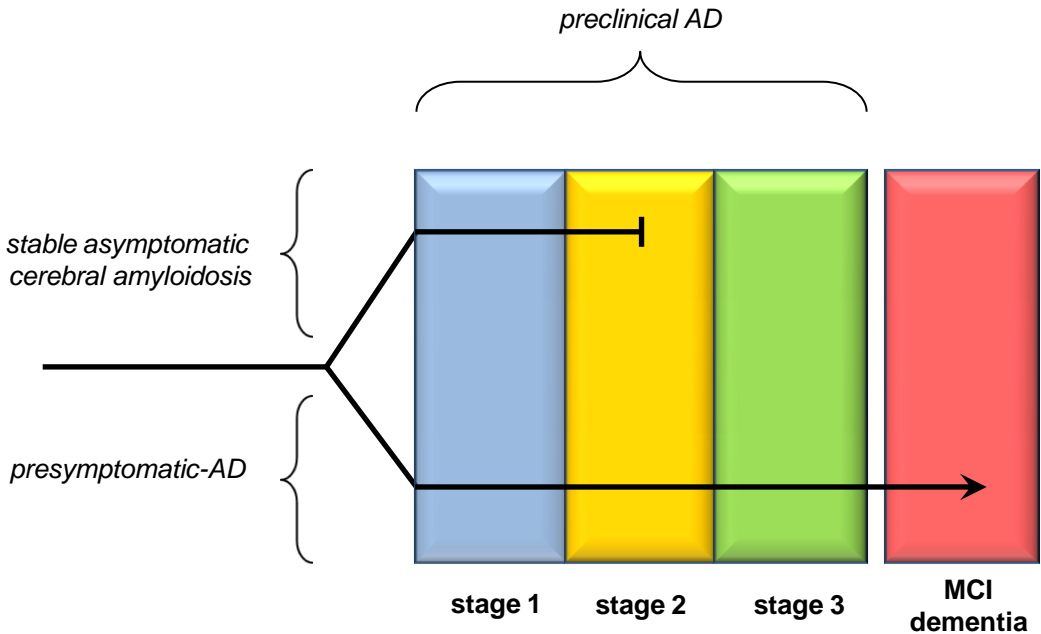

|                                                       |          |          |          |          |
|-------------------------------------------------------|----------|----------|----------|----------|
| <b>A<math>\beta</math></b><br><i>(PET or CSF)</i>     | <b>+</b> | <b>+</b> | <b>+</b> | <b>+</b> |
| <b>Neuronal injury</b><br><i>(tau, FDG-PET, sMRI)</i> | <b>-</b> | <b>+</b> | <b>+</b> | <b>+</b> |
| <b>Subtle cognition decline</b>                       | <b>-</b> | <b>-</b> | <b>+</b> | <b>-</b> |
| <b>Major cognition decline</b>                        | <b>-</b> | <b>-</b> | <b>-</b> | <b>+</b> |
